# Supplementary material for: Selective adsorption of oil–water mixtures using polydimethylsiloxane (PDMS)–graphene sponges
Source: Royal Society of Chemistry journal article supplement (doi:10.1039/c5ew00035a), 2015-01-01
Supplement: c5ew00035a6.pdf [file c5ew00035a6.pdf]

## Selective adsorption of oil/water mixtures using polydimethylsiloxane (PDMS)-graphene sponges

Diana N.H. Tran<sup>a</sup>, Shervin Kabiri<sup>a</sup>, Ting Rui Sim<sup>a</sup>, and Dusan Losic<sup>a\*</sup>

<sup>a</sup> School of Chemical Engineering, The University of Adelaide, Adelaide, SA 5005, Australia

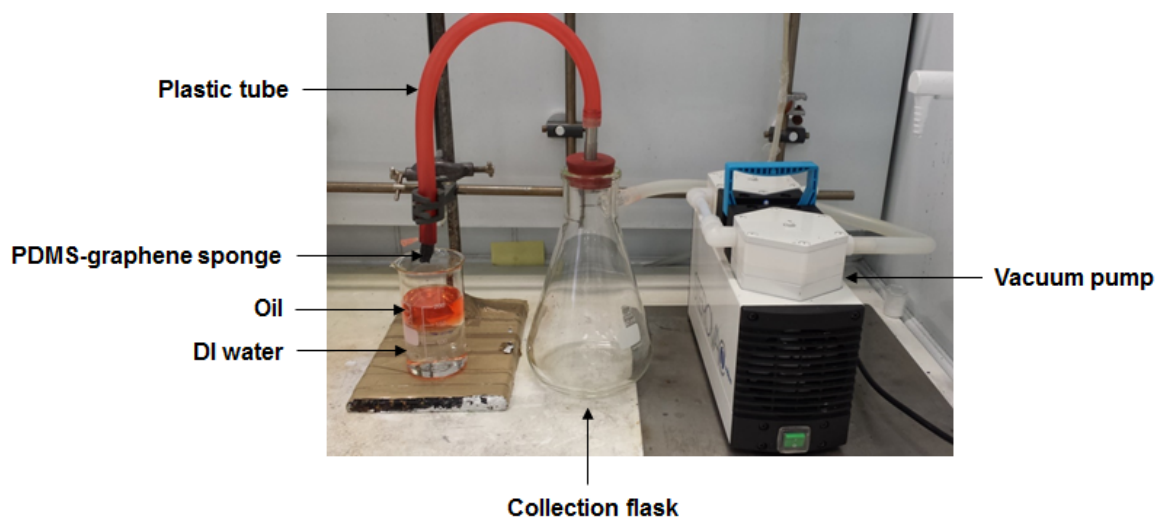

**Fig. S1** Vacuum system setup for continuous oil removal from water
